# Supplementary material for: Population Pharmacokinetic Analysis of Cefiderocol, a Parenteral Siderophore Cephalosporin, in Healthy Subjects, Subjects with Various Degrees of Renal Function, and Patients with Complicated Urinary Tract Infection or Acute Uncomplicated Pyelonephritis
Source: PubMed Central journal article supplement (PMC5786804; doi:10.1128/aac.01391-17), 2018-01-25
Supplement: AAC.01391-17_zac001186760s1.pdf [file AAC.01391-17_zac001186760s1.pdf]

## Supplemental Materials

Table S1 Summary of Clinical Study Designs

| Study                                                                                      | Dose regimen                                                                                                                                                                                                            | Subjects dosed cefiderocol                                                                                                                                      | Plasma PK sampling                                                                                                                                                                                                                                                                                                                                                                                                                                                                                       |
|--------------------------------------------------------------------------------------------|-------------------------------------------------------------------------------------------------------------------------------------------------------------------------------------------------------------------------|-----------------------------------------------------------------------------------------------------------------------------------------------------------------|----------------------------------------------------------------------------------------------------------------------------------------------------------------------------------------------------------------------------------------------------------------------------------------------------------------------------------------------------------------------------------------------------------------------------------------------------------------------------------------------------------|
| Phase 1 single ascending single dose and multiple dose study for healthy subjects in Japan | Part 1:<br>Single cefiderocol 0.1-, 0.25-, 0.5-, 1-, 2-g doses or matching placebo infused over 1 hour<br><br>Part 2:<br>Multiple cefiderocol 1- or 2-g doses, or matching placebo infused over 1 hour q8hr for 10 days | Part 1:<br>30<br><br>Part 2:<br>24                                                                                                                              | Part 1:<br>Predose, 0.5, 1, 1.25, 1.5, 2, 2.5, 3, 3.5, 4, 4.5, 5, 6, 8, 10, 12, 16, 24, 36 and 48 hours from the start of the infusion<br><br>Part 2:<br>Day 1 (morning dose: first dose):<br>predose, 0.5, 1, 1.25, 1.5, 2, 2.5, 3, 3.5, 4, 4.5, 5, 6, 8, 10, 12 and 16 hours<br>Days 2, 3, 5, 8 and 9 (each morning dose): predose<br>Day 10 (morning dose: last dose):<br>predose, 0.5, 1, 1.25, 1.5, 2, 2.5, 3, 3.5, 4, 4.5, 5, 6, 8, 10, 12, 16, 24, 36 and 48 hours from the start of the infusion |
| Phase 1 renal impairment study in US                                                       | Single cefiderocol 1-g dose infused over 1 hour                                                                                                                                                                         | 38;<br>8 subjects each: normal renal function, mild and moderate renal impairment; 6 subjects: severe renal impairment; 8 subjects: ESRD requiring hemodialysis | Predose, 0.25, 0.5, 1, 1.5, 2, 3, 4, 5, 6, 8, 12, 16, 24, 36, 48 and 72 hours from the start of the infusion                                                                                                                                                                                                                                                                                                                                                                                             |
| Phase 2 study for patients with cUTI and AUP                                               | Cefiderocol 2-g doses infused over 1 hour q8hr with adjustments for creatinine clearance and body size                                                                                                                  | 300                                                                                                                                                             | Just prior to the infusion of the dose, -0.25 to 0 hours at the end of infusion, and $1 \pm 0.5$ hours after the end of infusion on Day 3                                                                                                                                                                                                                                                                                                                                                                |

q8hr = every 8 hours

Table S2 Dose Regimen of Cefiderocol in the Phase 2 cUTI Study

| Nominal Dose 6.0 g/day |                               |            |             |
|------------------------|-------------------------------|------------|-------------|
|                        | Creatinine Clearance (mL/min) |            |             |
| Body Weight (kg)       | ≥ 71                          | 41 – 70    | 21 - 40     |
| ≥70                    | 2.0 g q8hr                    | 1.0 g q6hr | 1.0 g q8hr  |
| 60                     | 2.0 g q8hr                    | 1.5 g q8hr | 1.0 g q8hr  |
| 50                     | 1.5 g q6hr                    | 1.5 g q8hr | 0.75 g q6hr |
| 40                     | 2.0 g q8hr                    | 1.0 g q6hr | 1.0 g q8hr  |
| 30                     | 1.5 g q6hr                    | 1.5 g q8hr | 1.0 g q8hr  |

q8hr = every 8 hours, q6hr = every 6 hours

Table S3 MIC Distribution for Each Pathogen

| Pathogen                            | MIC (µg/mL) |       |       |      |      |      |      |     |   |   |   |   |
|-------------------------------------|-------------|-------|-------|------|------|------|------|-----|---|---|---|---|
|                                     | <=0.004     | 0.008 | 0.015 | 0.03 | 0.06 | 0.12 | 0.25 | 0.5 | 1 | 2 | 4 | 8 |
| <i>CITROBACTER FREUNDII</i>         | 0           | 0     | 0     | 0    | 0    | 1    | 0    | 0   | 1 | 0 | 0 | 0 |
| <i>CITROBACTER FREUNDII COMPLEX</i> | 0           | 0     | 0     | 0    | 0    | 0    | 0    | 1   | 0 | 0 | 0 | 0 |
| <i>ENTEROBACTER CLOACAE</i>         | 0           | 0     | 0     | 0    | 0    | 0    | 1    | 0   | 0 | 0 | 0 | 0 |
| <i>ENTEROBACTER CLOACAE COMPLEX</i> | 0           | 0     | 0     | 1    | 1    | 5    | 1    | 0   | 0 | 0 | 0 | 0 |
| <i>ESCHERICHIA COLI</i>             | 13          | 3     | 8     | 22   | 21   | 20   | 12   | 8   | 6 | 4 | 1 | 0 |
| <i>KLEBSIELLA OXYTOCA</i>           | 0           | 1     | 0     | 0    | 0    | 0    | 0    | 0   | 0 | 0 | 0 | 0 |
| <i>KLEBSIELLA PNEUMONIAE</i>        | 0           | 3     | 4     | 1    | 3    | 2    | 9    | 4   | 4 | 3 | 3 | 1 |
| <i>MORGANELLA MORGANII</i>          | 0           | 0     | 2     | 0    | 0    | 1    | 0    | 0   | 0 | 0 | 0 | 0 |
| <i>PROTEUS MIRABILIS</i>            | 3           | 2     | 1     | 1    | 2    | 3    | 1    | 0   | 0 | 0 | 0 | 0 |
| <i>PSEUDOMONAS AERUGINOSA</i>       | 0           | 1     | 0     | 3    | 2    | 2    | 2    | 0   | 0 | 0 | 0 | 0 |
| <i>SERRATIA MARCESCENS</i>          | 0           | 0     | 1     | 0    | 0    | 0    | 0    | 0   | 0 | 0 | 0 | 0 |

MIC = minimum inhibitory concentration

Figure S1 Correlations of Renal Function Markers

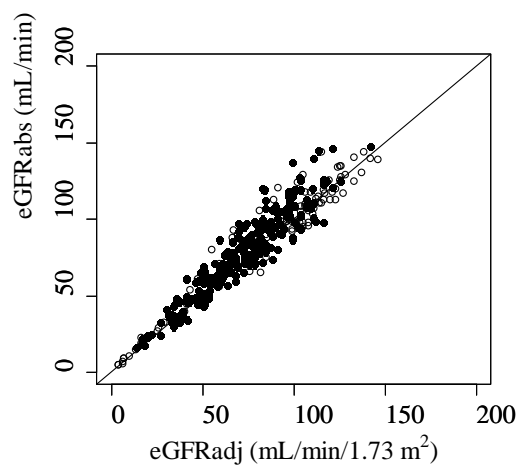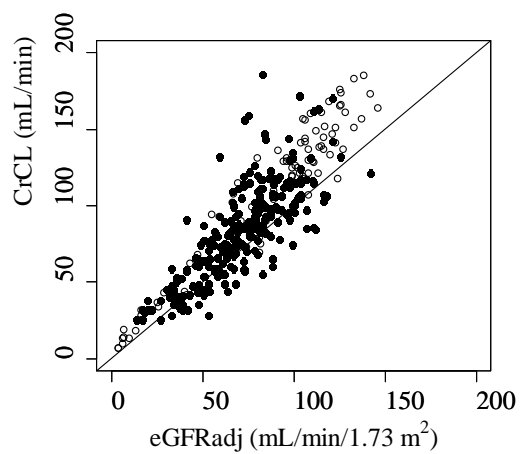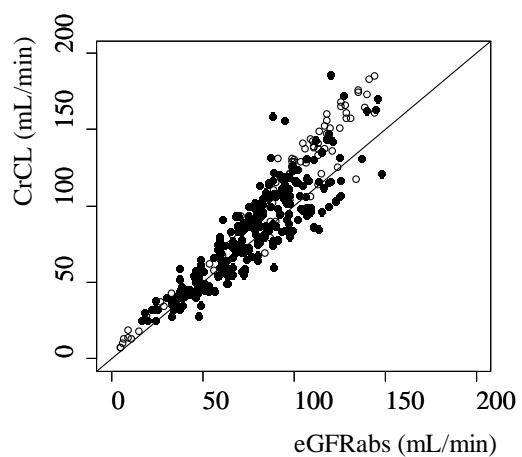

Filled circle: patients with infection. Unfilled circle: subjects without infection. Solid line:  $y = x$ .

Figure S2 Relationships between CL and eGFRadj and eGFRabs

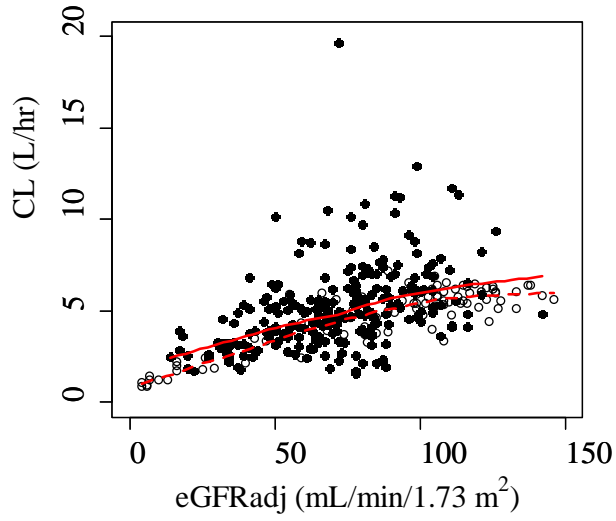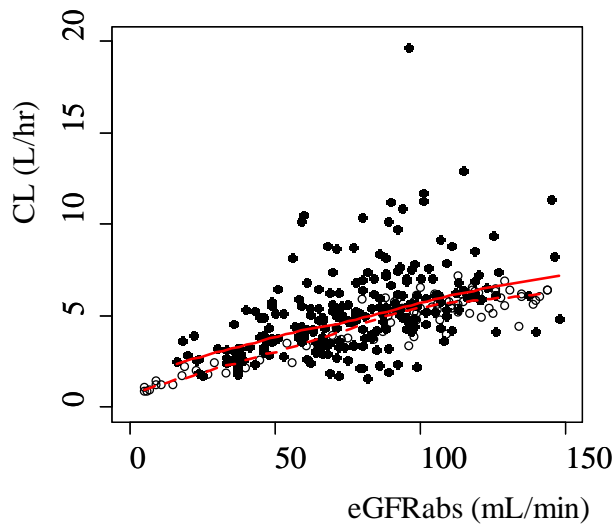

Filled circle: patients with infection. Unfilled circle: subjects without infection. Line: a LOWESS line (solid: patients with infection, dashed: subjects without infection).

Figure S3 Goodness-of-fit Plots for the Final Model with CrCL

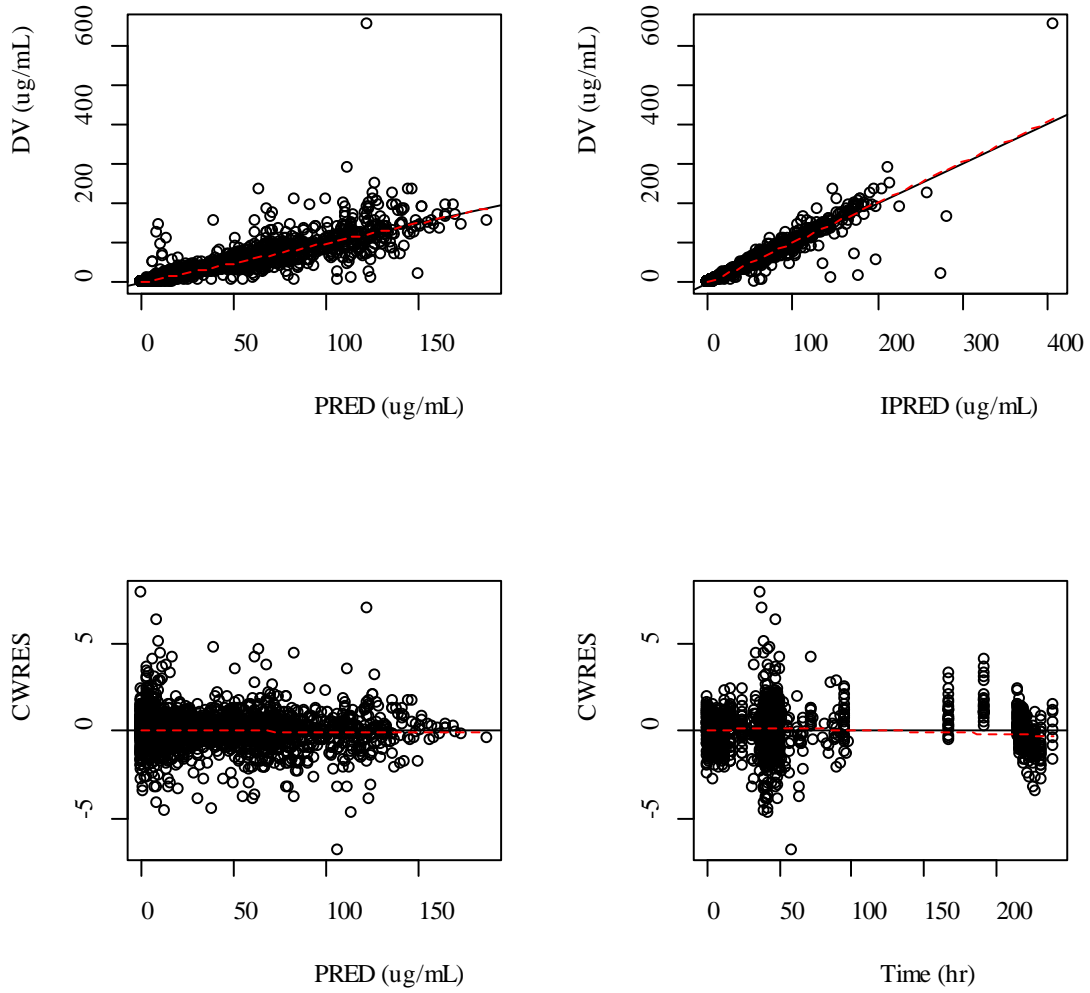

Solid line:  $y = x$  in upper figures and  $y = 0$  in lower figures. Dashed line: a LOWESS line.
